# Supplementary material for: Multi-site, multi-platform comparison of MRI T1 measurement using the system phantom
Source: PubMed Central journal article supplement (PMC8244851; doi:10.1371/journal.pone.0252966), 2021-06-30
Supplement: pone.0252966.s002.pdf [file pone.0252966.s002.pdf]

### **S1 File. Details for calculations in Fig 7.**

First, we assumed that a reasonable diagnostic criteria based on the data in (8) was the center half of the reported interval for low grade gliomas and glioblastomas (i.e.,  $T_{1,LGG}$  diagnostic range is 1262 ms to 1449 ms, and  $T_{1,GBM}$  diagnostic range is 1828 ms to 1898 ms).

We assumed that the biases and dispersions of MRI  $T_1$  measurement techniques were constant over the range of  $T_1$  required by this scenario,  $\sim 1200$  ms to  $\sim 1900$  ms. These constants were determined using measurement data from the two NiCl<sub>2</sub> array samples closest to this diagnostic range. In this case, these are the two longest values,  $T_{1,NMR} = 1489$  ms and  $T_{1,NMR} = 2033$  ms.

We used Markov chain Monte Carlo algorithm (Gibbs sampling) to estimate the distribution of measured  $T_1$  times that would result at 3 T for each vendor and measurement technique (IR and VFA) when presented with a distribution of  $T_1$  times lying within the low-grade glioma and glioblastoma diagnostic intervals. For each of these low-grade glioma and glioblastoma scenarios, we assumed that the true  $T_1$  is a uniform random variable with endpoints as per the diagnostic criteria. For any true  $T_1$  drawn from this interval, we assume that the  $T_1$  as measured using qMRI will be normally distributed with a mean and variance defined by applying the bias and dispersion factors determined by our study. The probability density for the MRI  $T_1$  value cannot be expressed in closed form; however, its conditional structure allows for efficient sampling. For all cases, we drew 10000 samples and used these to compute the means and 95 % confidence intervals for the distribution of  $T_1$  measurements.
